# Supplementary material
Source: PubMed Central journal article supplement (PMC4260090)

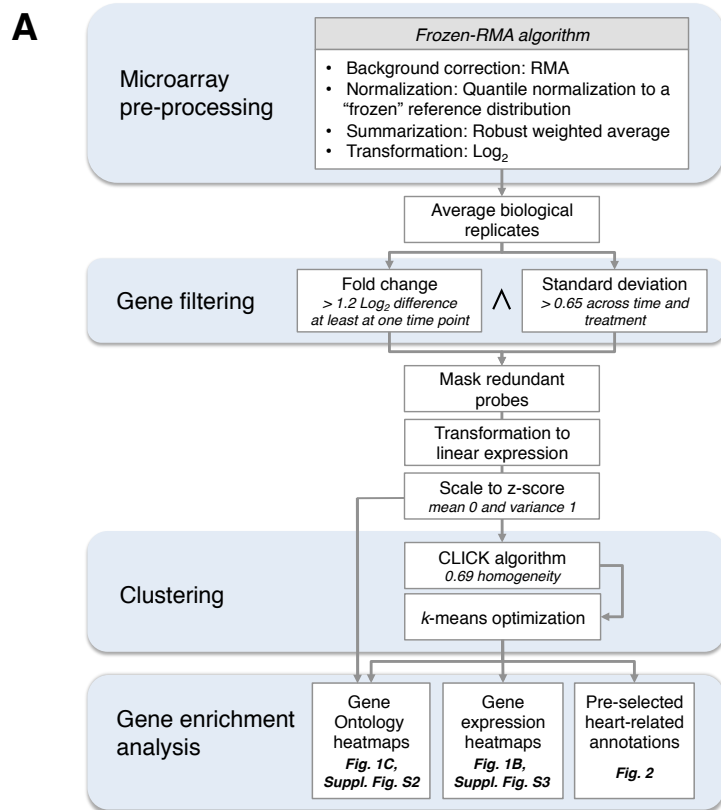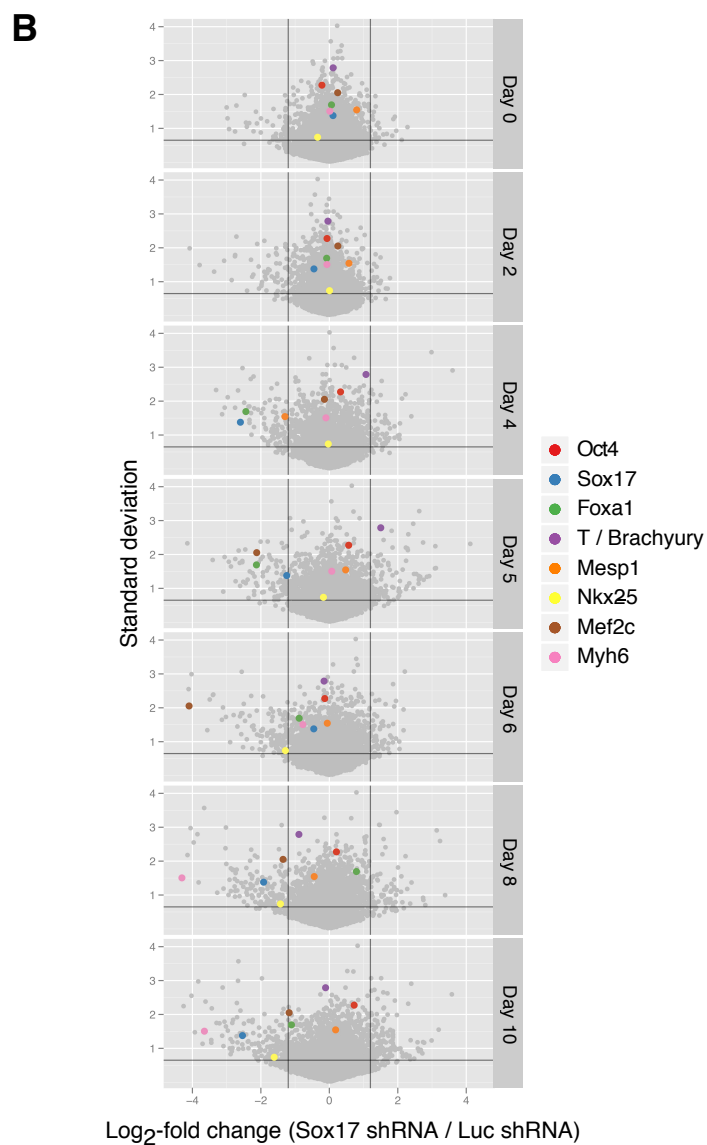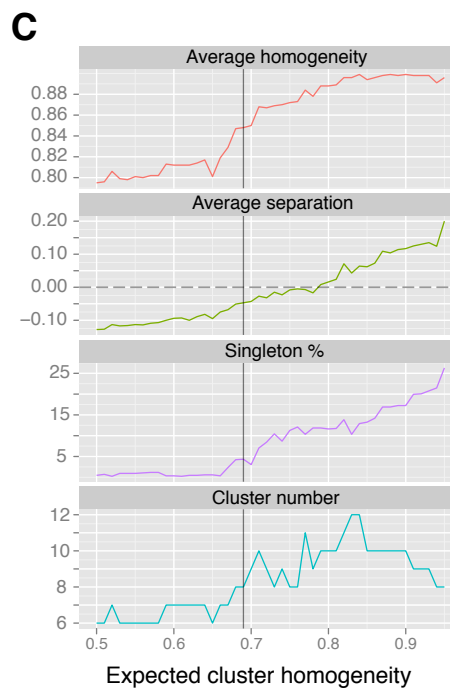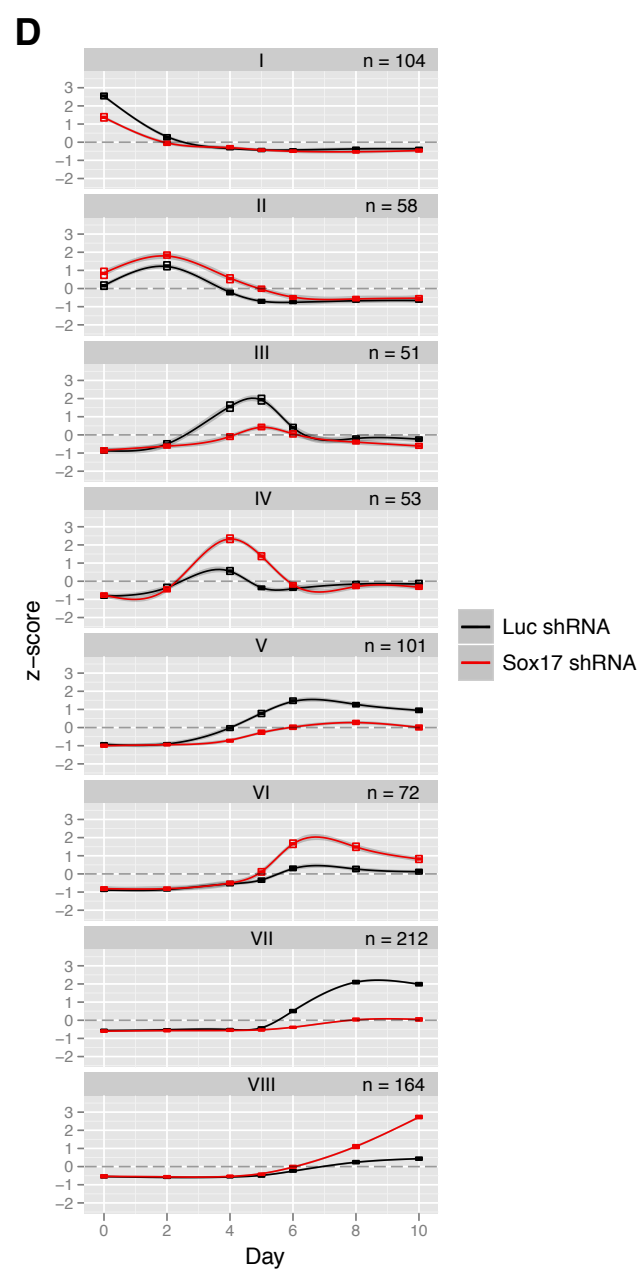

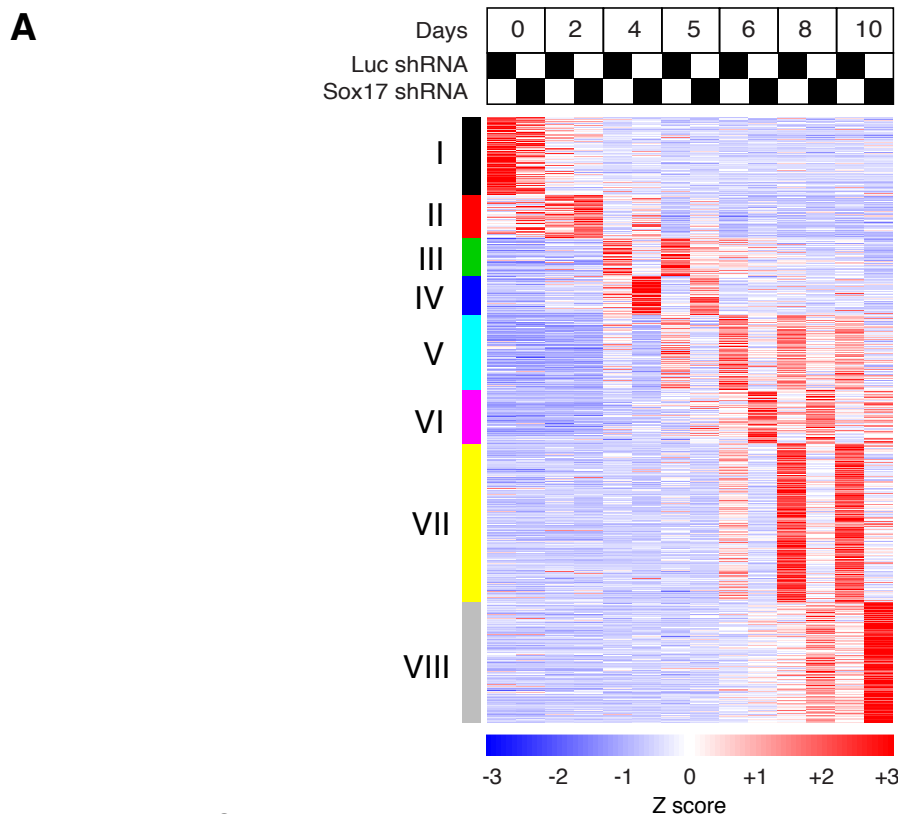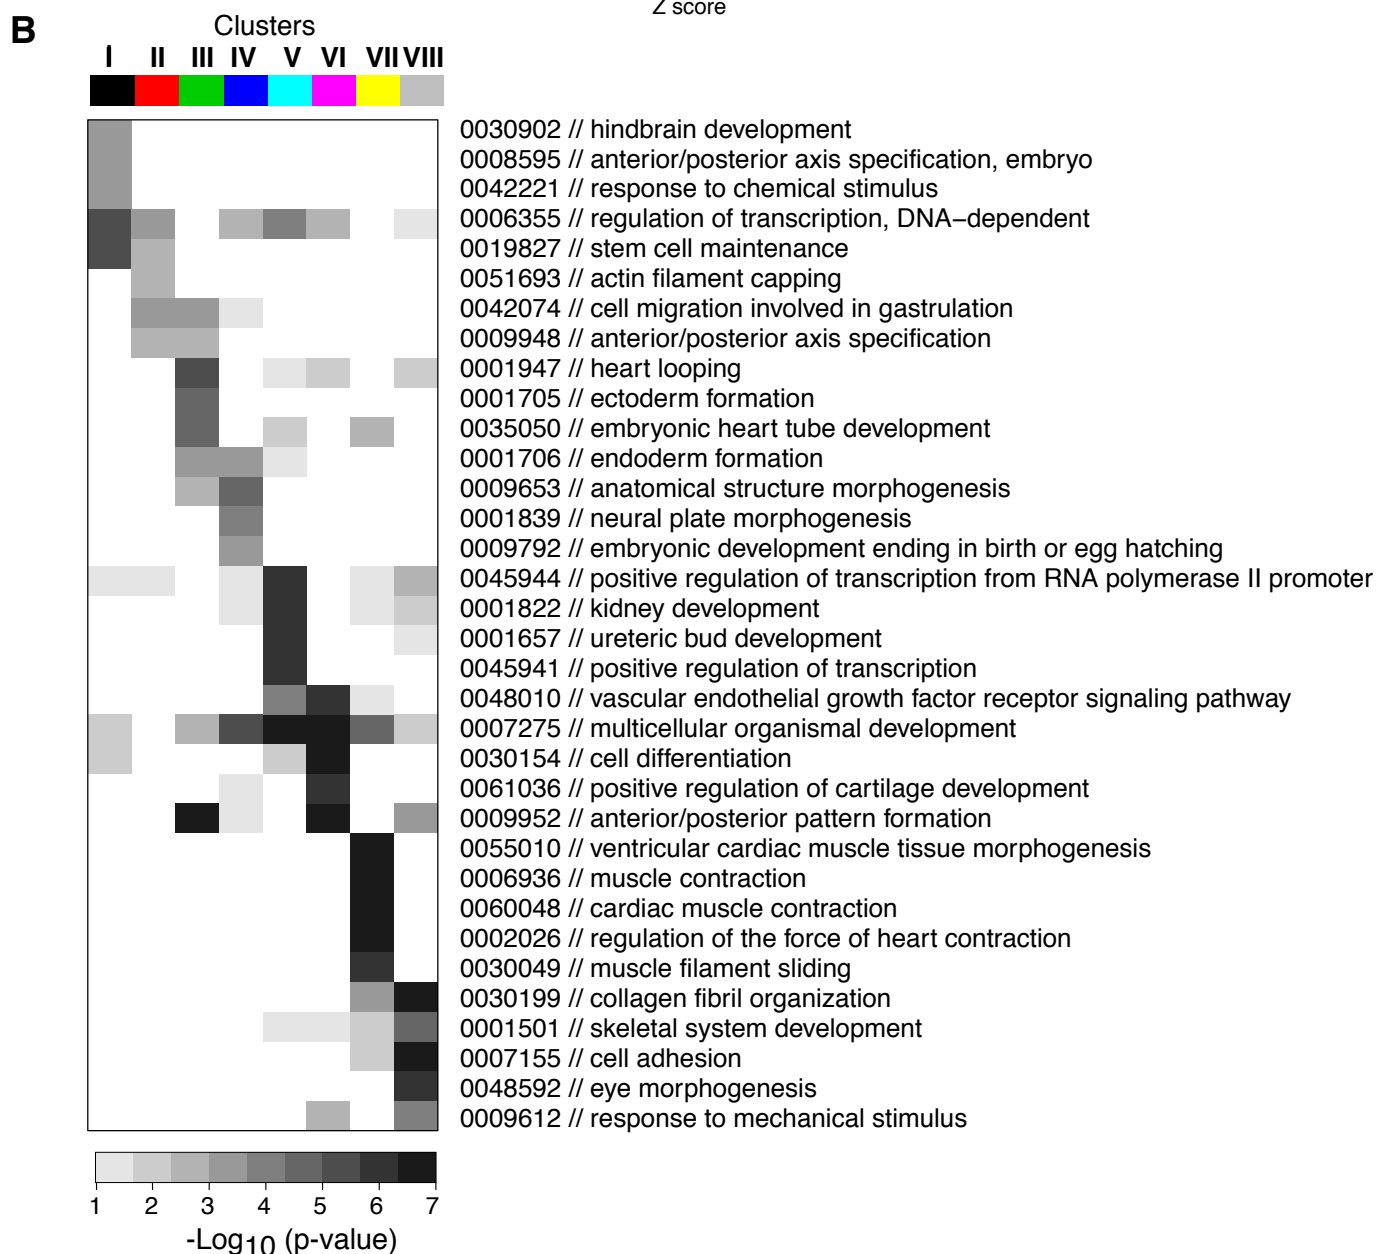

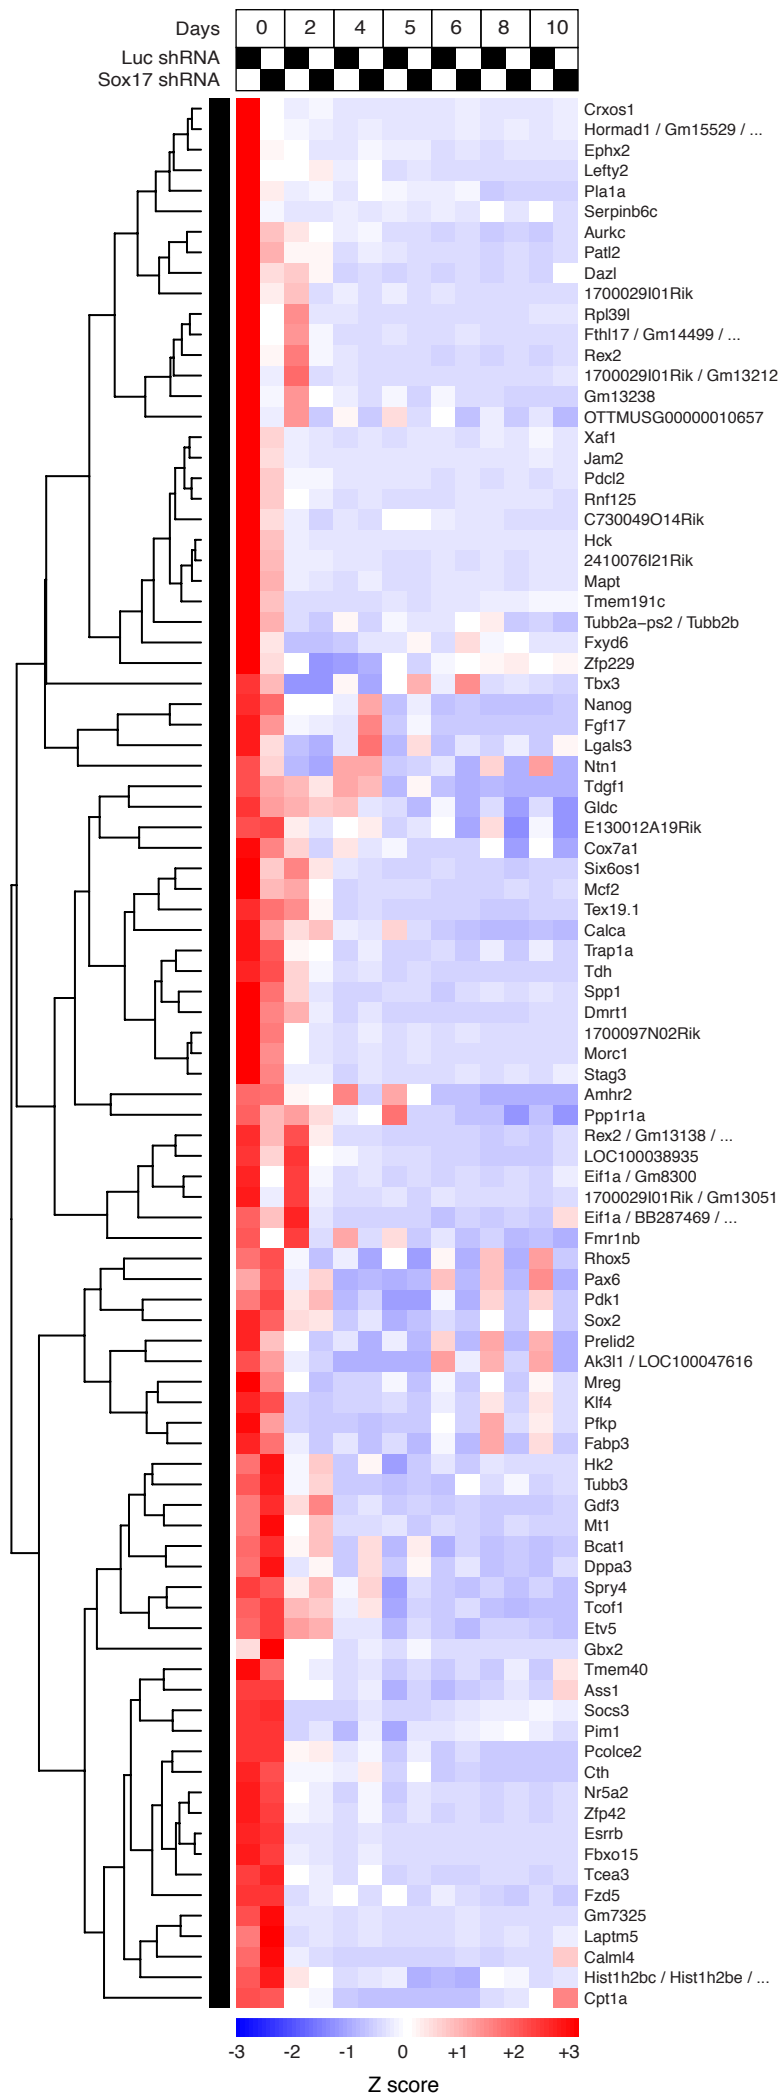

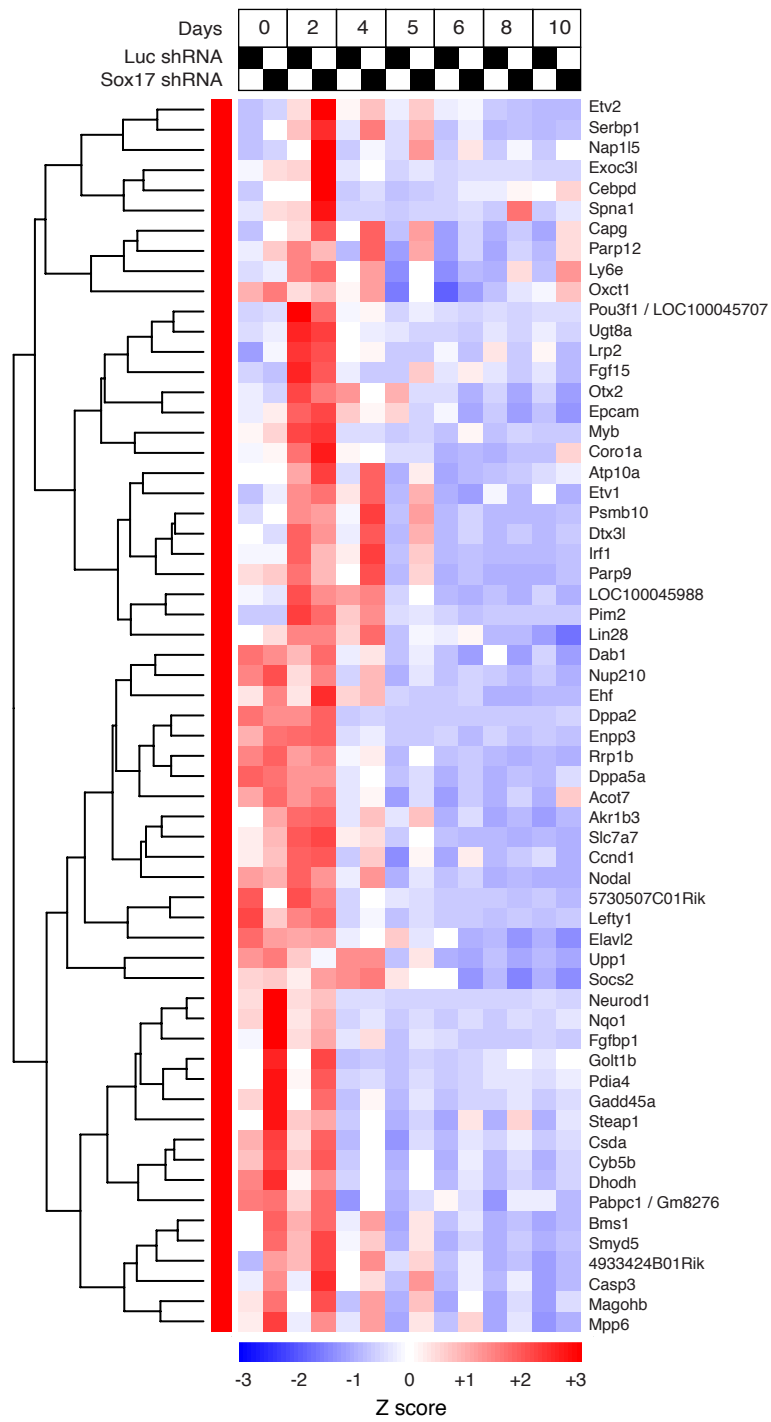

Cluster II

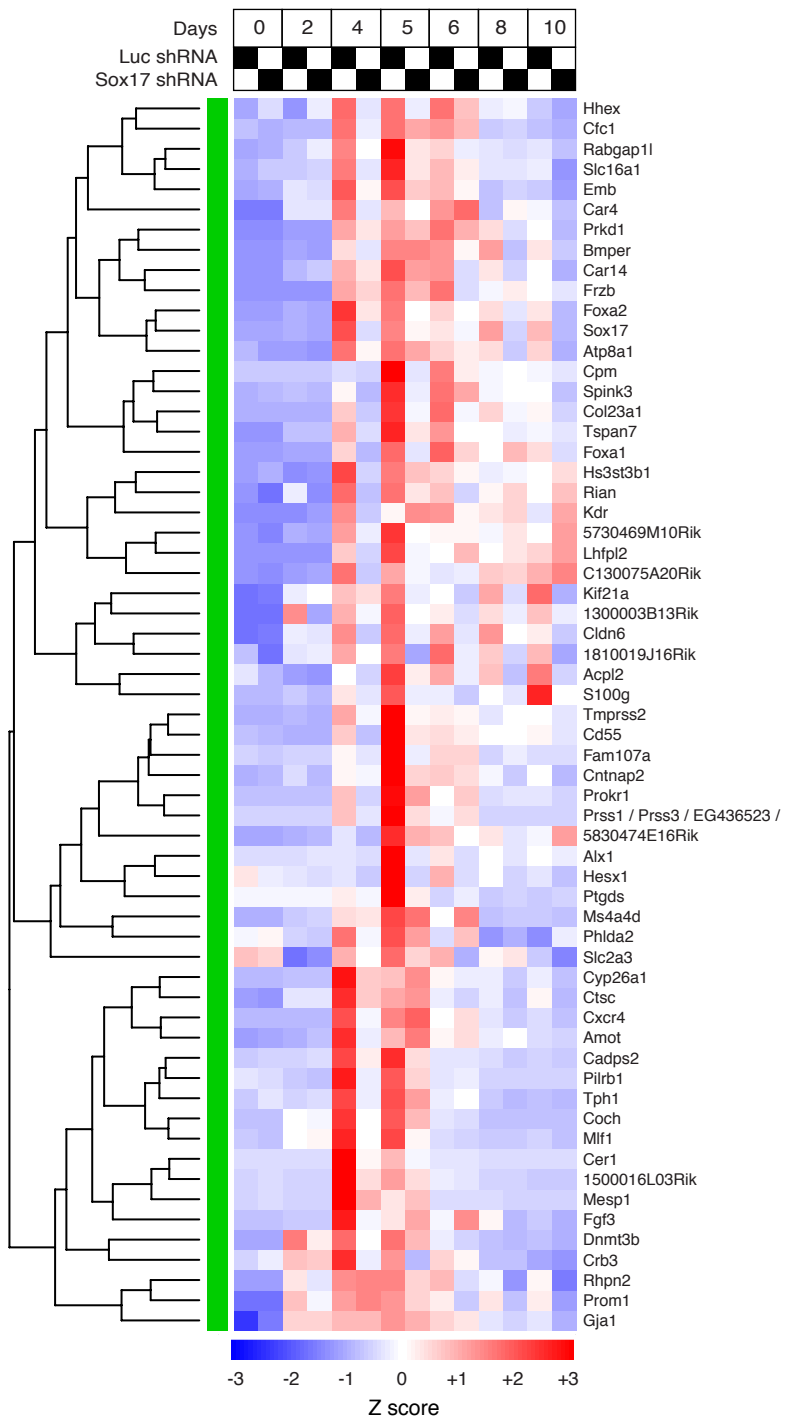

Cluster III

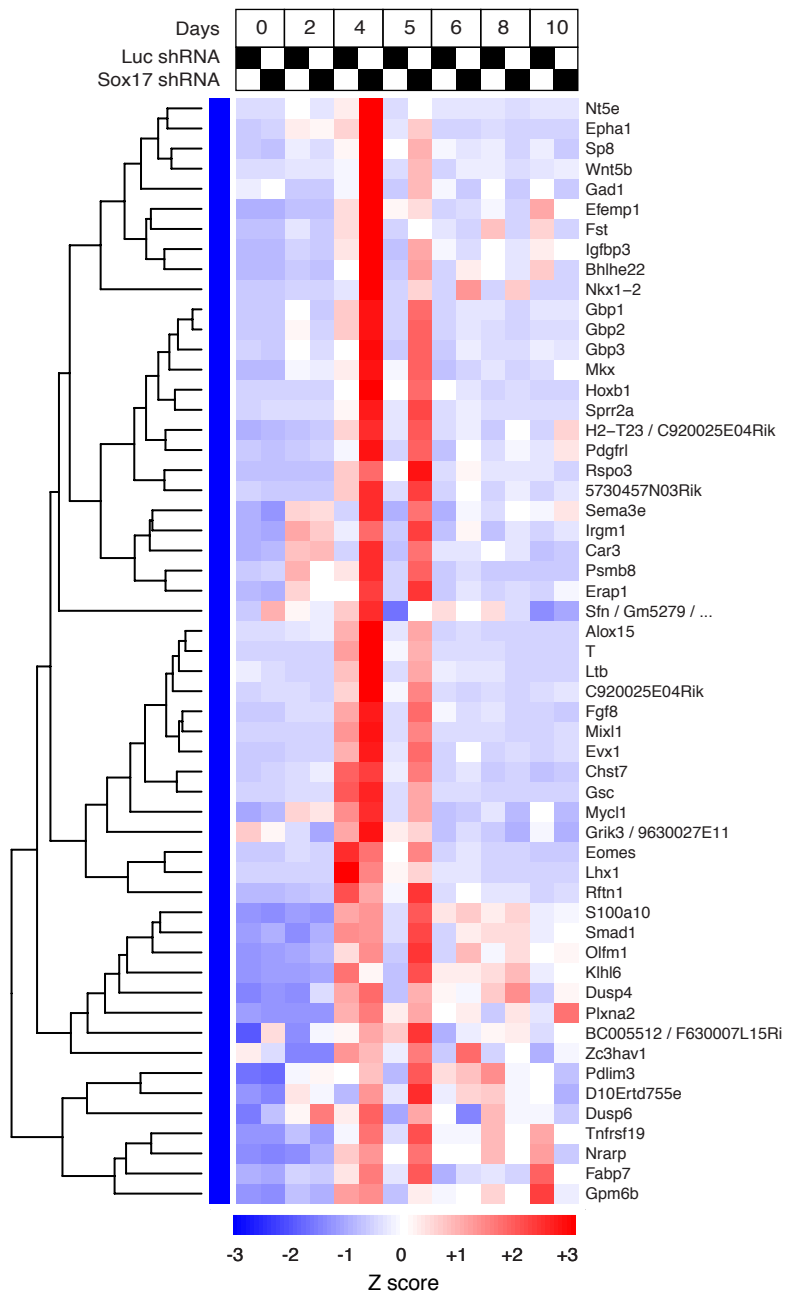

Cluster IV

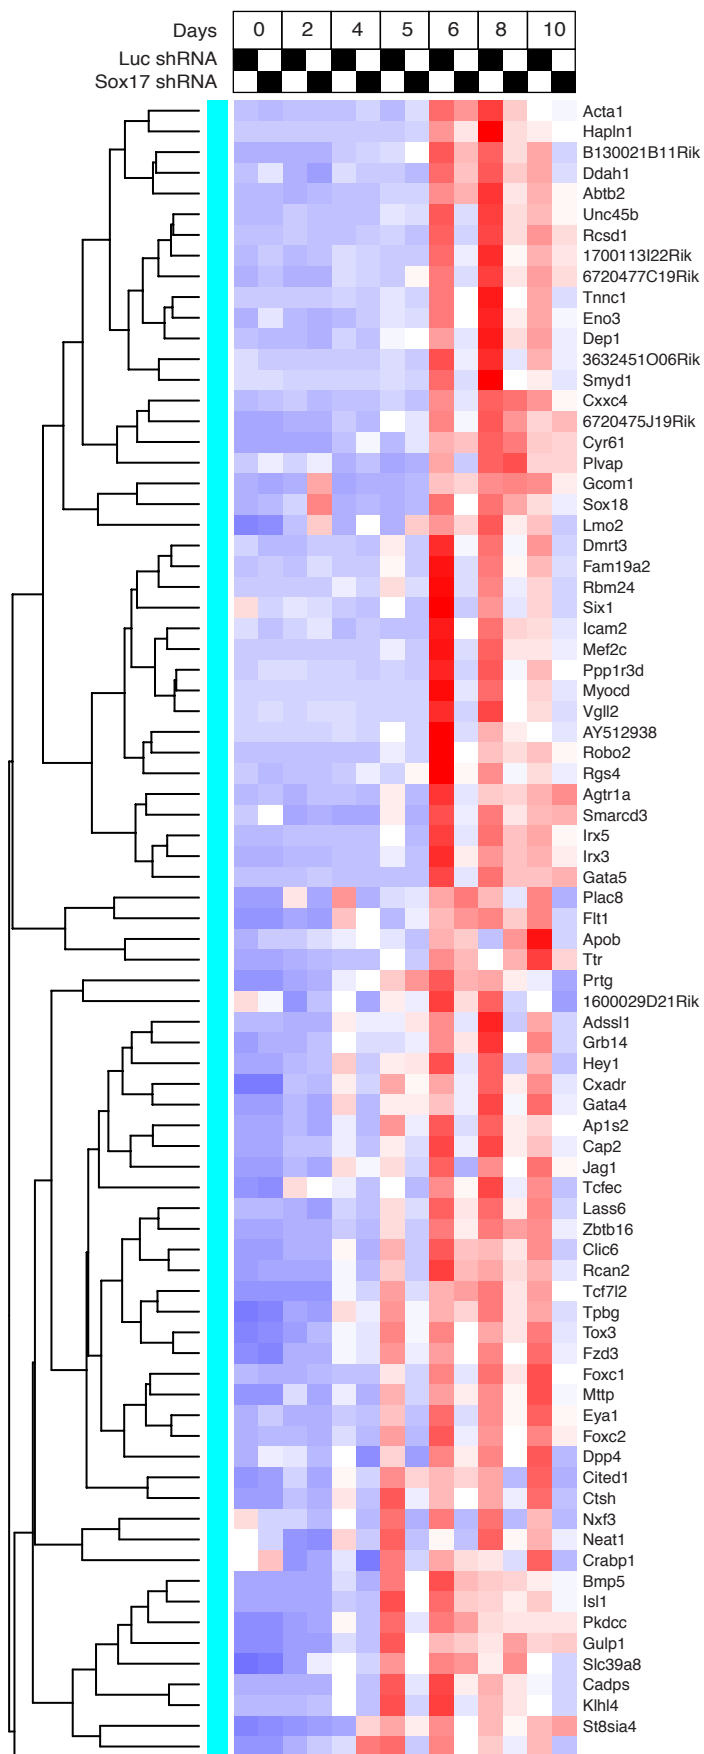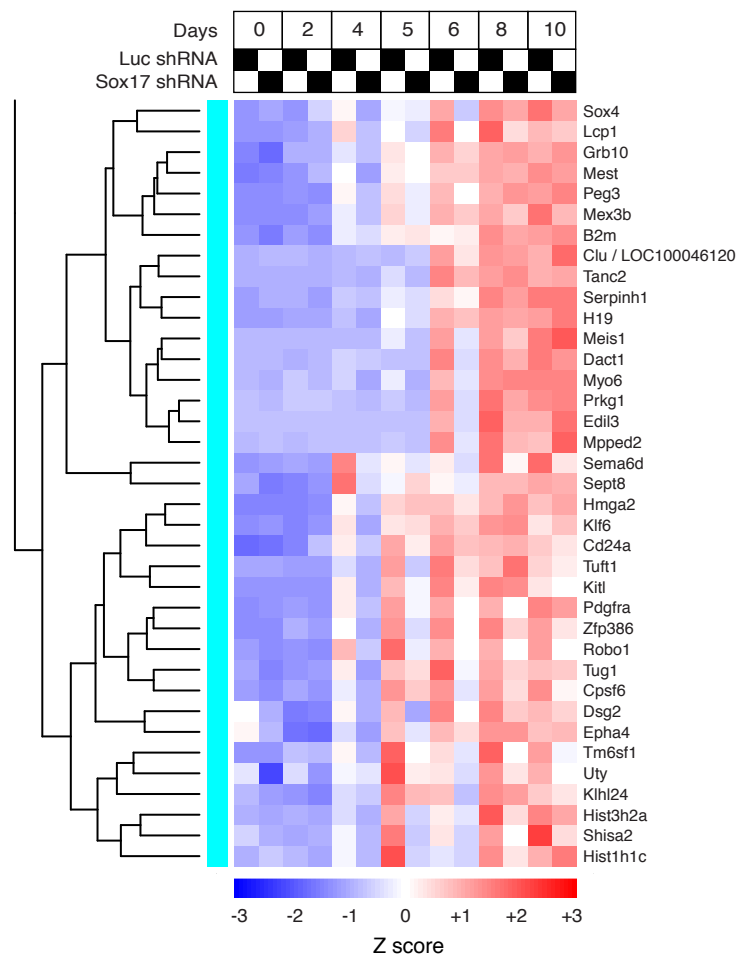

Cluster V

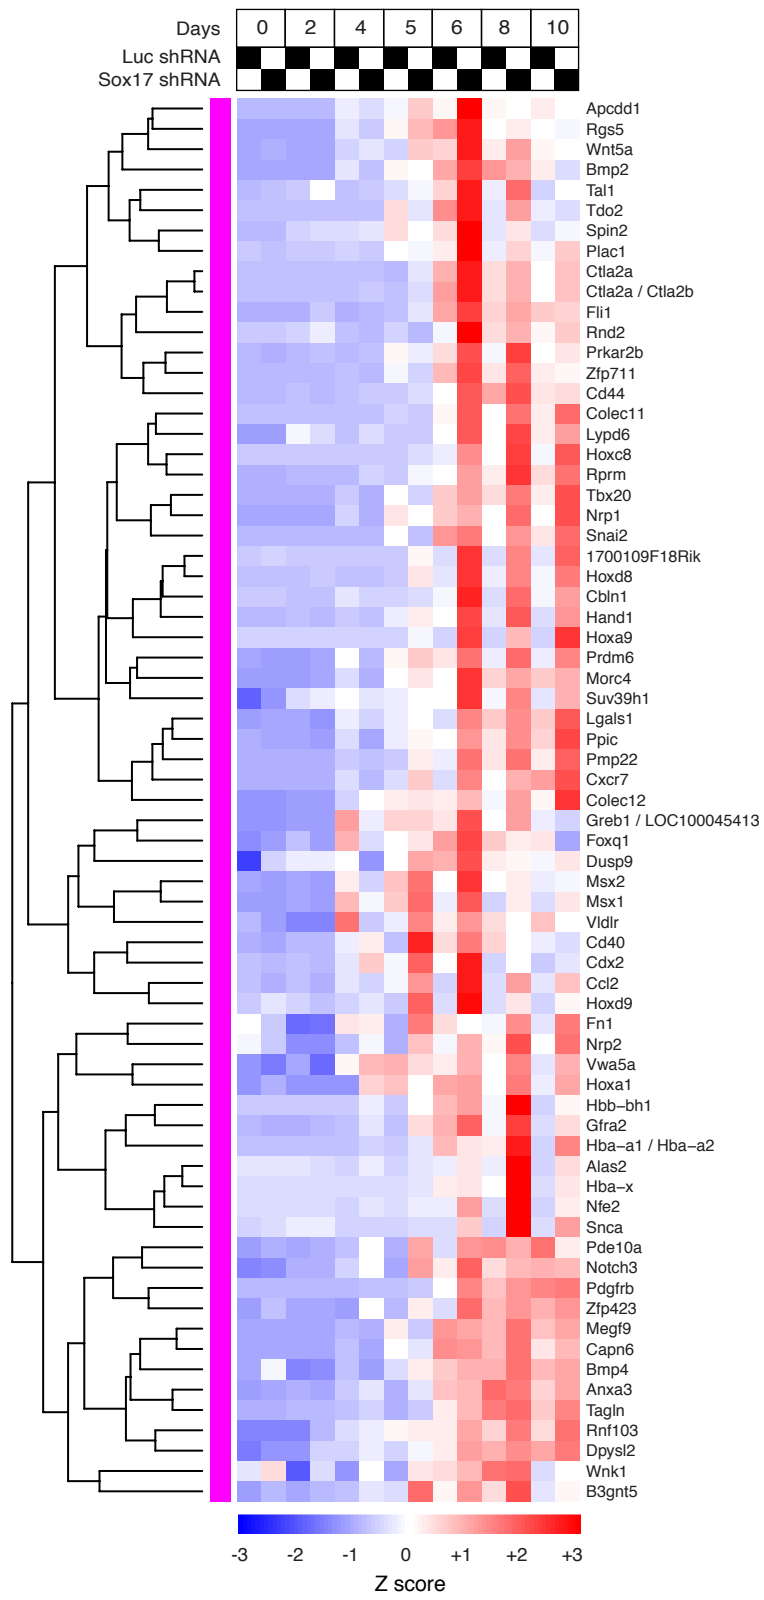

Cluster VI



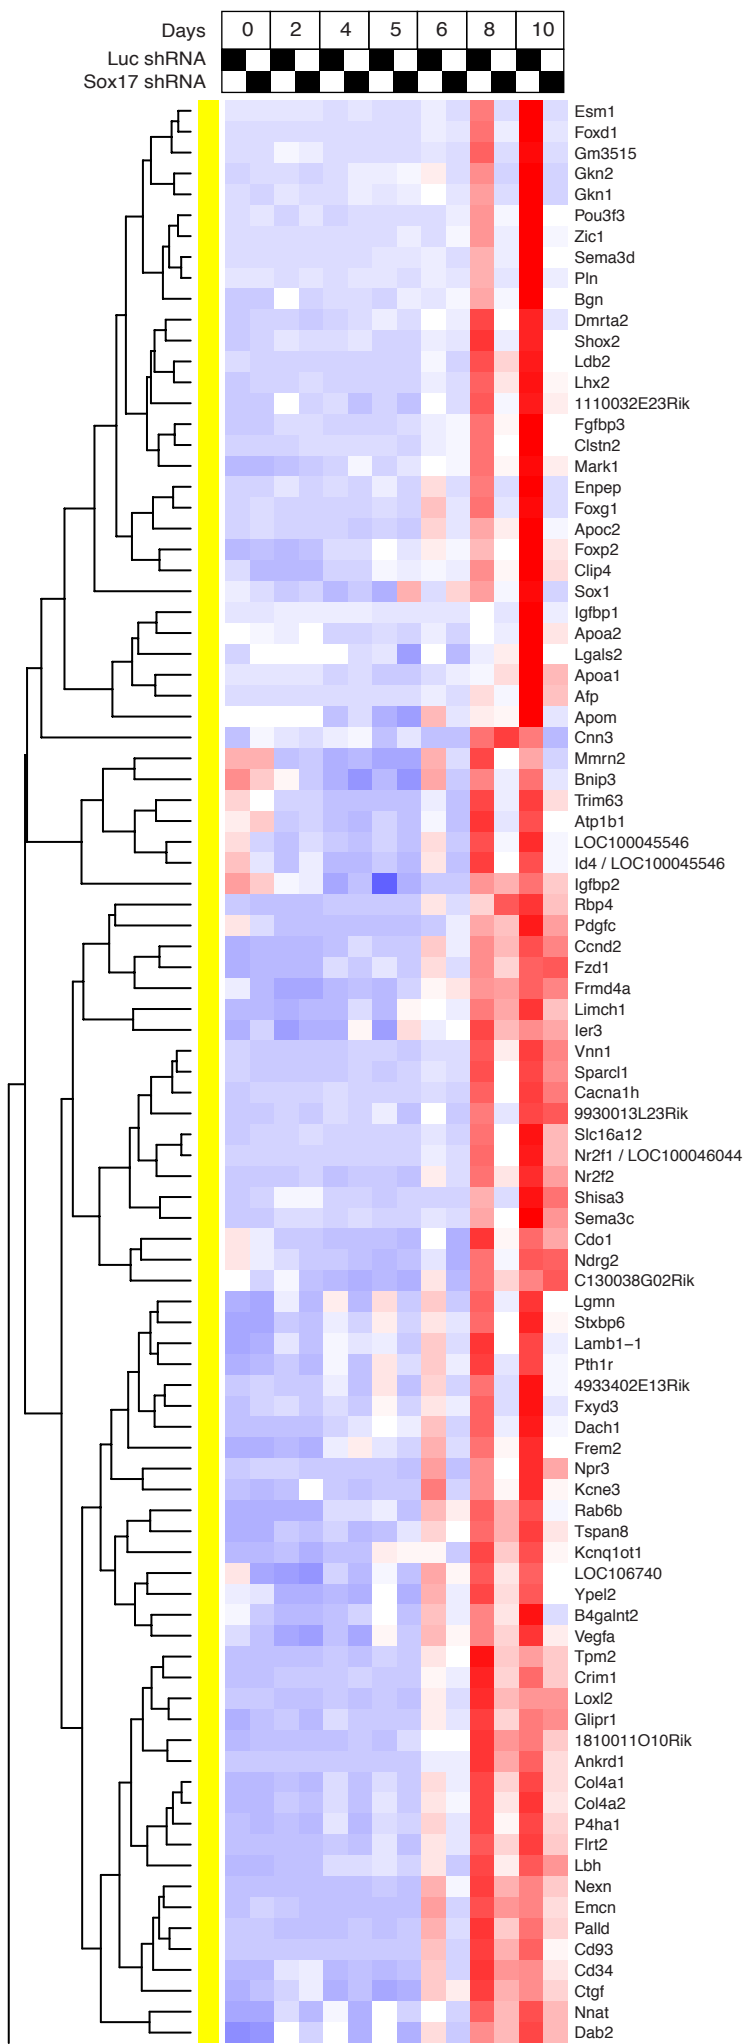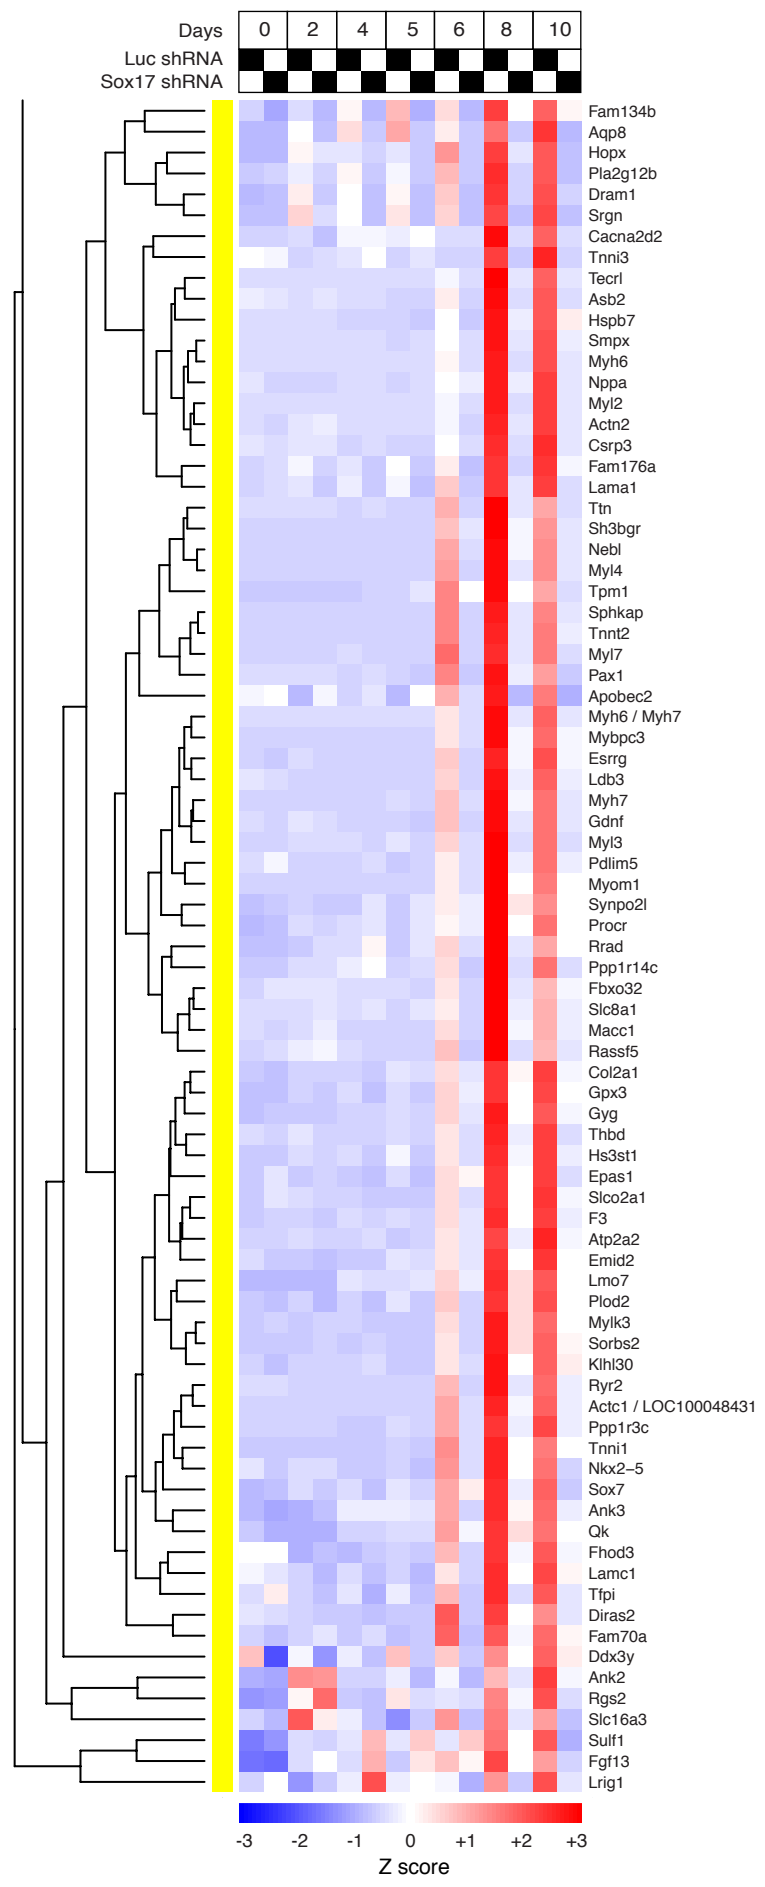

Cluster VII

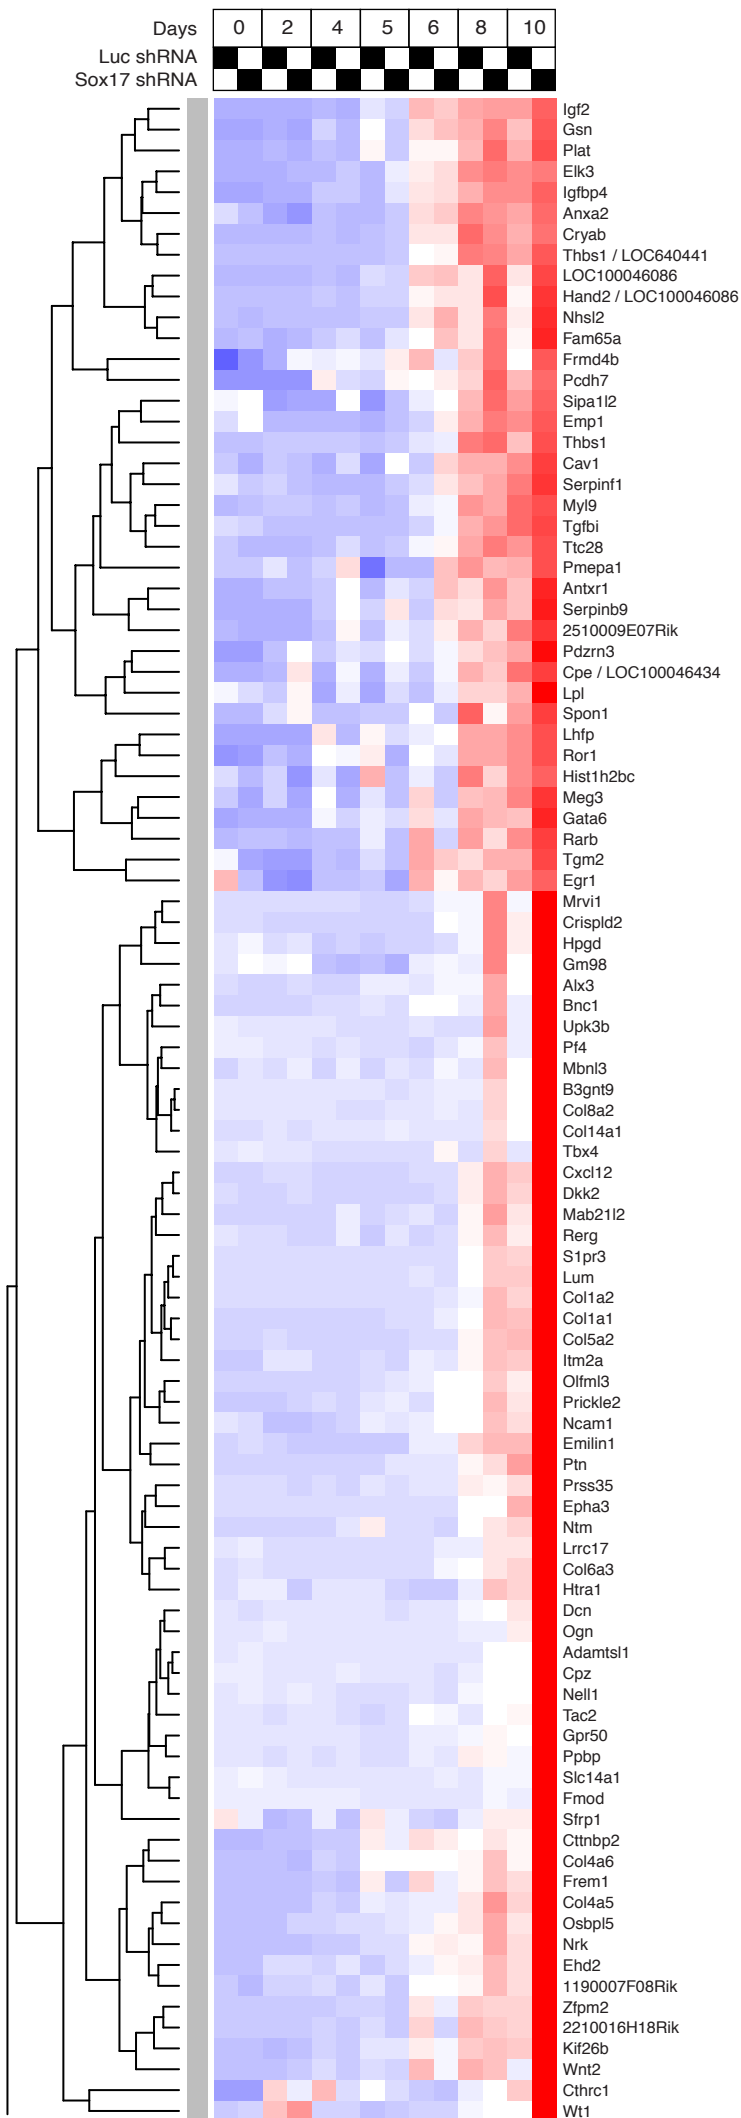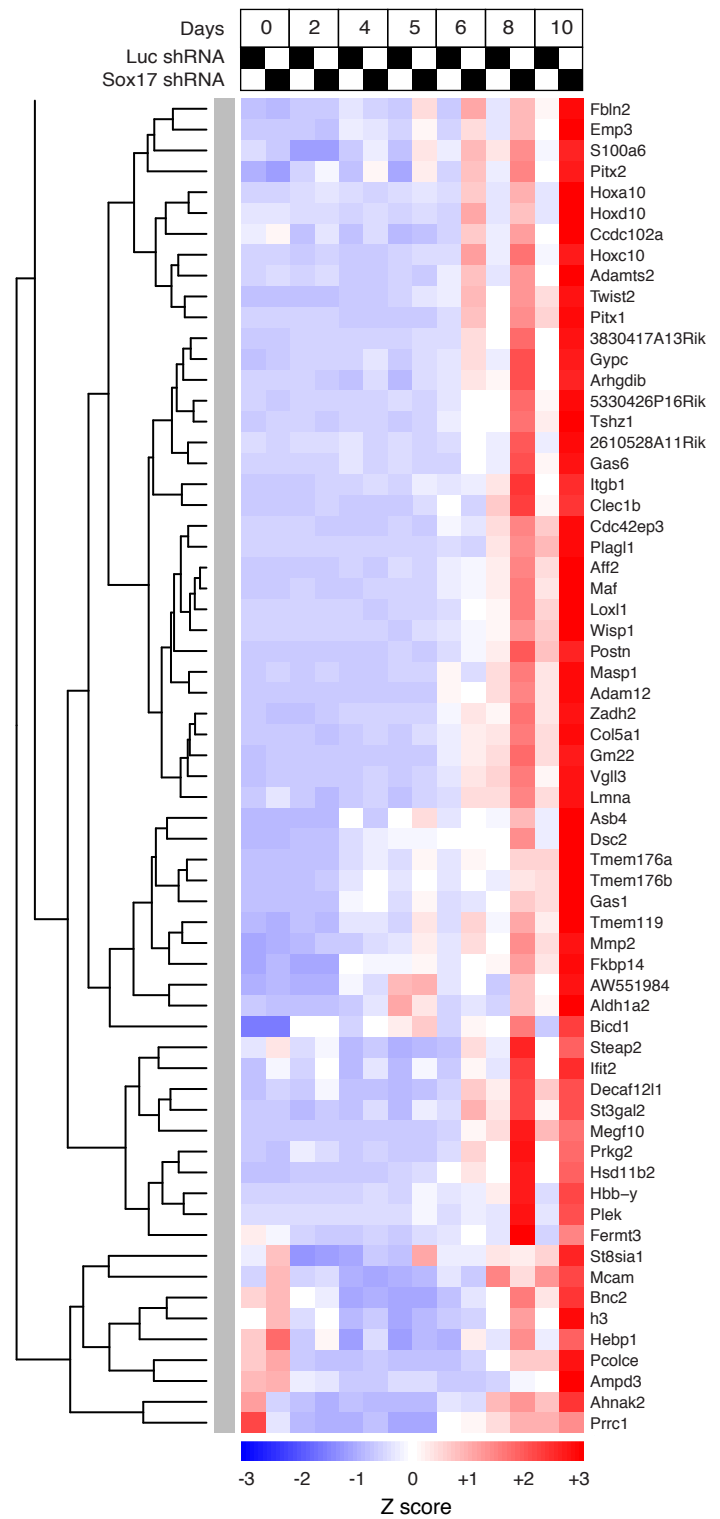

Cluster VIII

**A**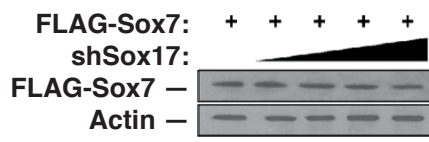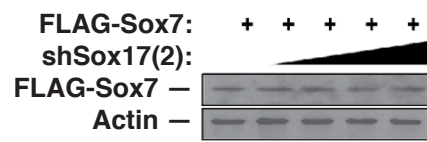**B**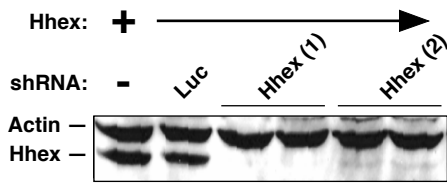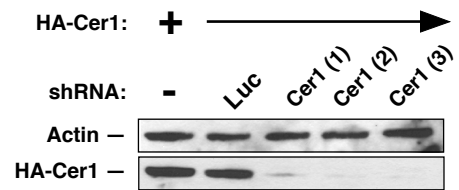

Supplement: stem0032-1515-SD2.pdf [file stem0032-1515-SD2.pdf]
